# Supplementary material
Source: PubMed Central journal article supplement (PMC4838949)
Supplement: am6b00661_si_001.pdf [file am6b00661_si_001.pdf]

## Supporting Information

# Microfluidic droplet-facilitated hierarchical assembly for dual cargo loading and synergistic delivery

*Ziyi Yu,<sup>‡,†</sup> Yu Zheng,<sup>‡,§</sup> Richard M. Parker,<sup>†</sup> Yang Lan,<sup>§</sup> Yuchao Wu,<sup>§</sup> Roger J.*

*Coulston,<sup>§</sup> Jing Zhang,<sup>†</sup> Oren A. Scherman,<sup>\*,§</sup> Chris Abell<sup>\*,†</sup>*

<sup>†</sup> Department of Chemistry, University of Cambridge, Lensfield Road, Cambridge

CB2 1EW, UK

<sup>§</sup> Melville Laboratory for Polymer Synthesis, Department of Chemistry, University of

Cambridge, Lensfield Road, Cambridge CB2 1EW, UK

ca26@cam.ac.uk; oas23@cam.ac.uk

<sup>‡</sup> Z.-Y. Yu and Y. Zheng contributed equally to this work.

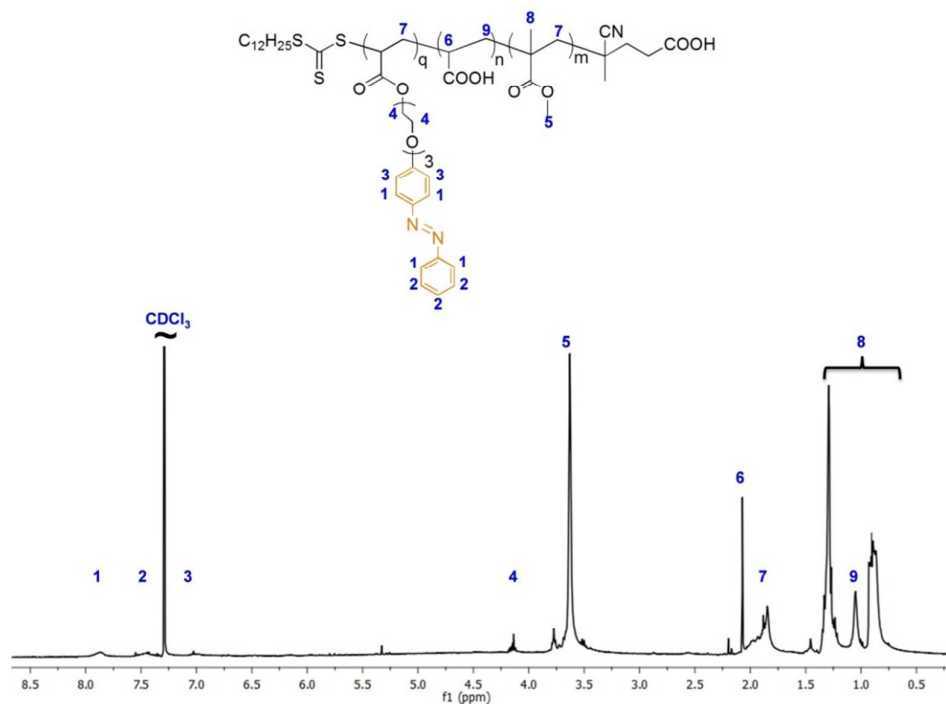

**Figure S1.** Chemical structure and  $^1\text{H}$  NMR spectrum of polymer **P1**: poly(methyl methacrylate)-*block*-poly(acrylic acid), containing pendant azobenzene groups.

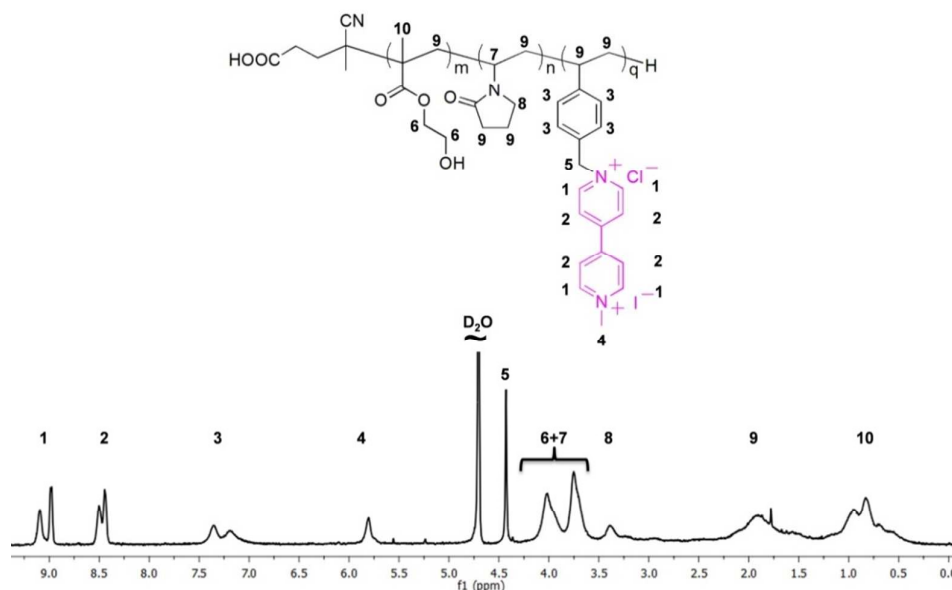

**Figure S2.** Chemical structure and  $^1\text{H}$  NMR spectrum of polymer **P2**: poly(*N*-vinylpyrrolidone)-*co*-poly(hydroxyethyl methacrylate)-*co*-poly(MV-styrene), containing pendant viologen groups.

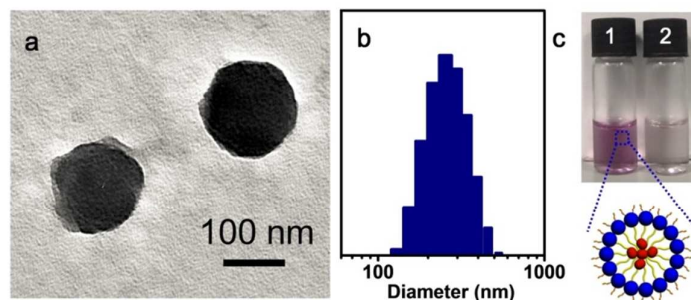

**Figure S3** (a) Transmission electron micrograph (TEM) of **P1** micelles and (b) size distribution by dynamic light scattering (DLS) measurement. (c) Photograph of vials containing: a suspension of Nile Red-containing **P1** micelles (left:vial 1) and insoluble Nile Red only (right:vial 2).

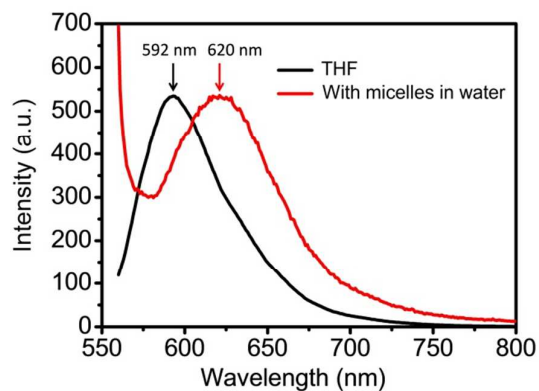

**Figure S4** Fluorescence spectra of Nile Red in tetrahydrofuran (THF) and within micelles in water.

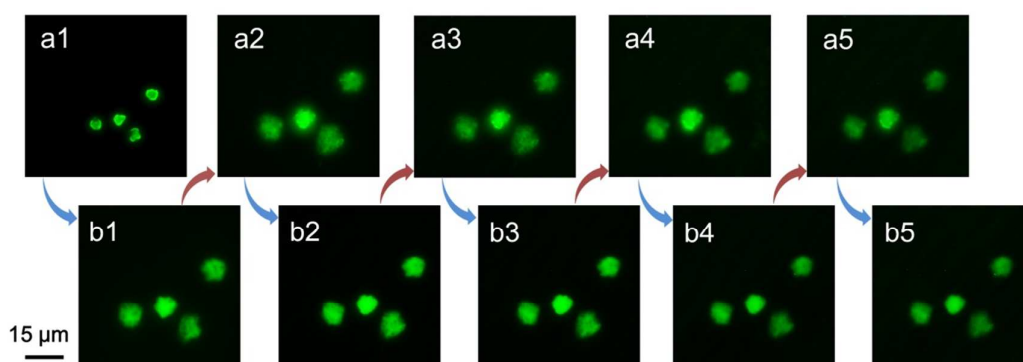

**Figure S5** Fluorescence images of microcapsules after five cycles of (a:1-5) dehydration and (b:1-5) rehydration, all cycles are 1 h in length. (Blue arrows represent hydration and red arrows represent dehydration of the microcapsules)

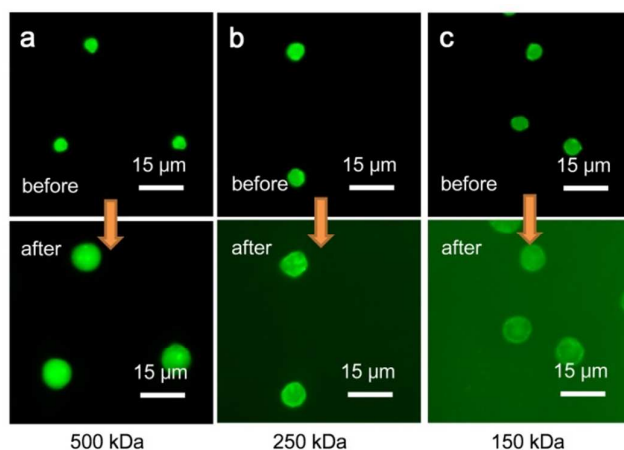

**Figure S6** Fluorescence images of microcapsules loaded with (a) 500 kDa, (b) 250 kDa, and (c) 150 kDa FITC-dextran before and after 3 hours rehydration in water.

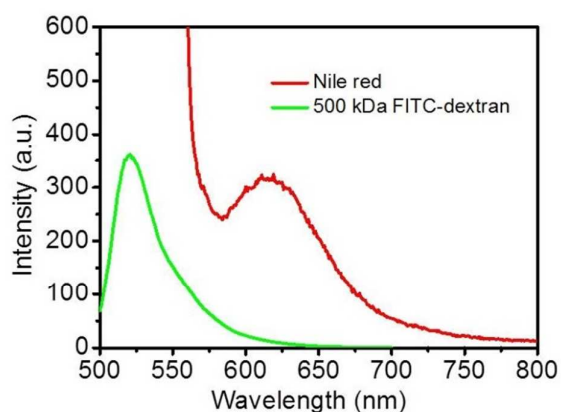

**Figure S7** Fluorescence spectra of cargo released from microcapsules after exposure to 1-adamantylamine solution. Green: 500 kDa FITC-dextran and Red: Nile Red .

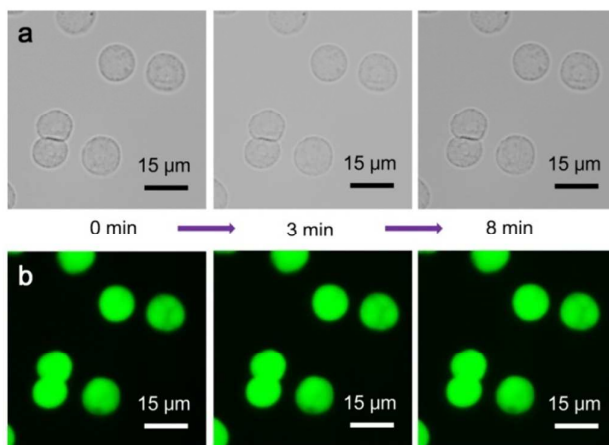

**Figure S8** (a) Transmission and (b) fluorescence micrographs of encapsulated 500 kDa FITC-dextran cargo upon rehydration without UV exposure (cf. Figure 6b-d).

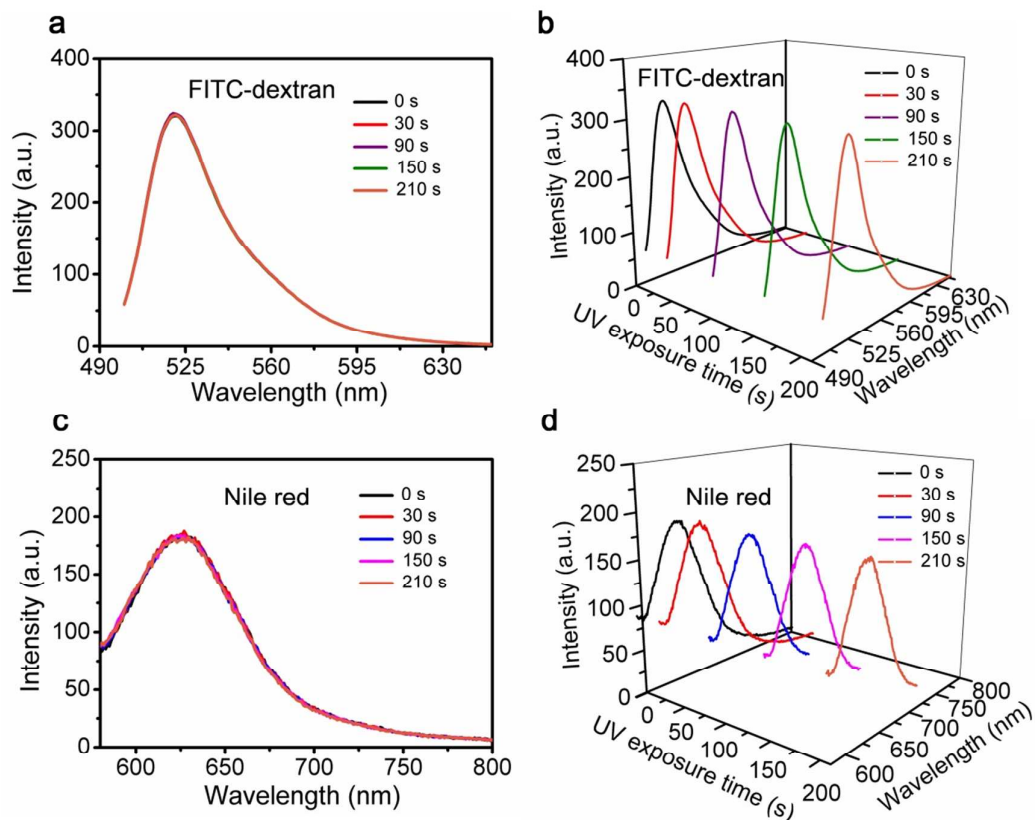

**Figure S9** (a) Fluorescence spectra and (b) the 3D distribution of 500 kDa FITC-dextran in water, after ultraviolet light irradiation of 0s, 30s, 90s, 150s, and 210s, respectively. (c) Fluorescence spectra and (d) the 3D distribution of Nile Red in **P1** micelles, after ultraviolet light irradiation of 0s, 30s, 90s, 150s, and 210s, respectively.

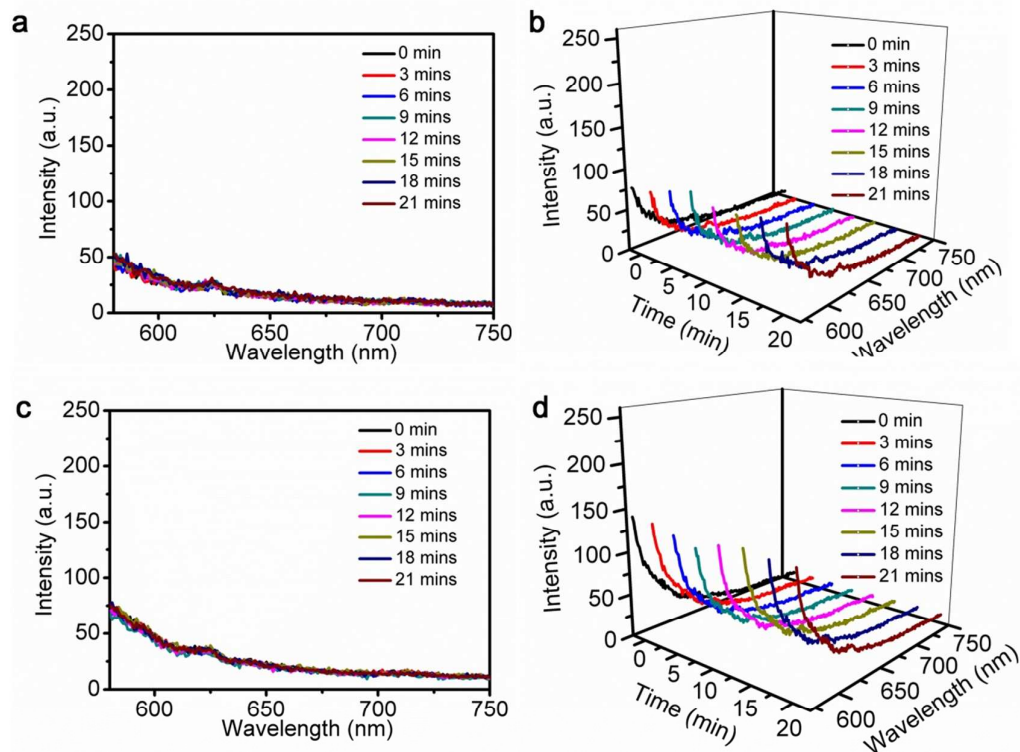

**Figure S10** (a) Fluorescence spectra (b) the 3D distribution of the released Nile Red in micelles as a function of the rehydration time (without 3 min UV exposure). (c) Fluorescence spectra (d) the 3D distribution of the released Nile Red in micelles as a function of the rehydration time with 3 min UV exposure.
